# Supplementary material for: A DNA dual lock-and-key strategy for cell-subtype-specific siRNA delivery
Source: PubMed Central journal article supplement (PMC5476801; doi:10.1038/ncomms13580), 2016-11-24
Supplement: ncomms13580-s1.pdf [file ncomms13580-s1.pdf]

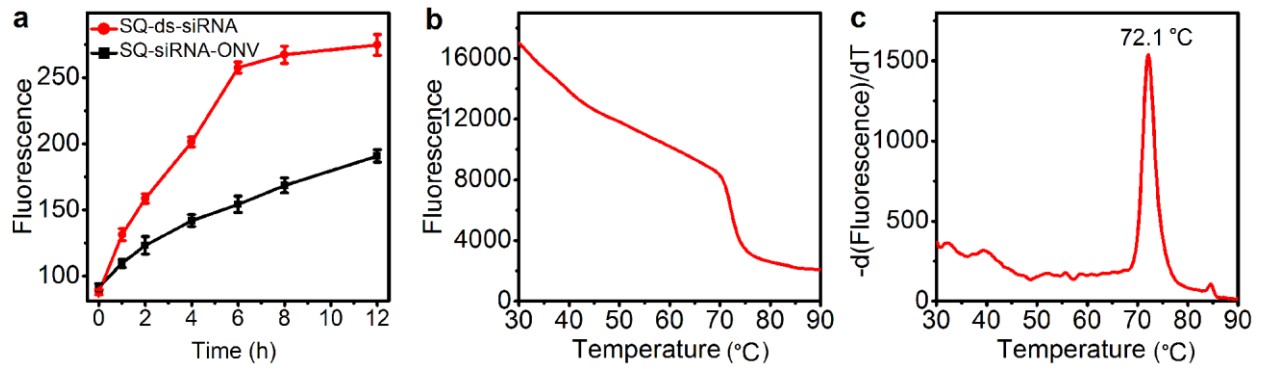

**Supplementary Figure 1 | Characterization of siRNA-ONV stability.** (a) Fluorescence recovery curves of SQ-siRNA-ONV and SQ-ds-siRNA in 1×TAMg buffer containing 10% serum. The data error bars indicate means  $\pm$  SD (n=3). (b) Melting curve of siRNA-ONV in thermal stability measurement with real-time PCR. (c) Negative first derivative of the melting curve of the siRNA-ONV.

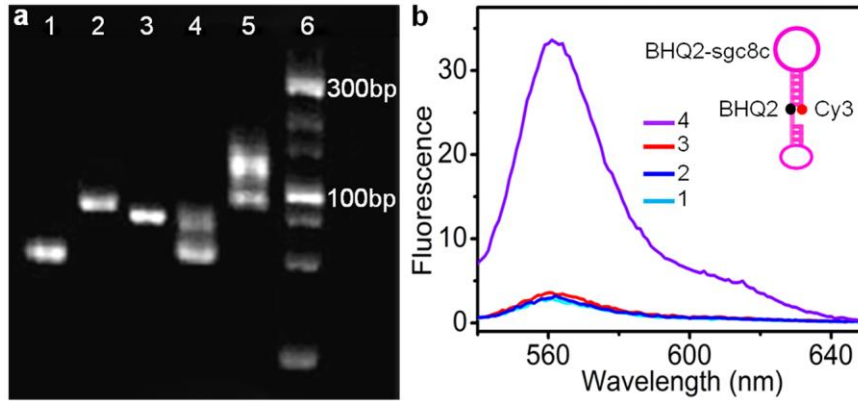

**Supplementary Figure 2 | Feasibility of dual parameter controlled “double locks” system. (a)** PAGE image of (1) DNA primer, (2) sgc4f, (3) sgc8c, (4) mixture of sgc8c and DNA primer, (5) mixture of sgc4f, sgc8c and DNA primer, (6) DNA ladder marker. **(b)** Fluorescence spectra of BHQ2-sgc8c (1) at  $\lambda_{ex}$  of 510 nm after incubated with sgc4f (2), ONV (3), and mixture of sgc4f and ONV (4). Inset in **(b)**: illustration of BHQ2-sgc8c.

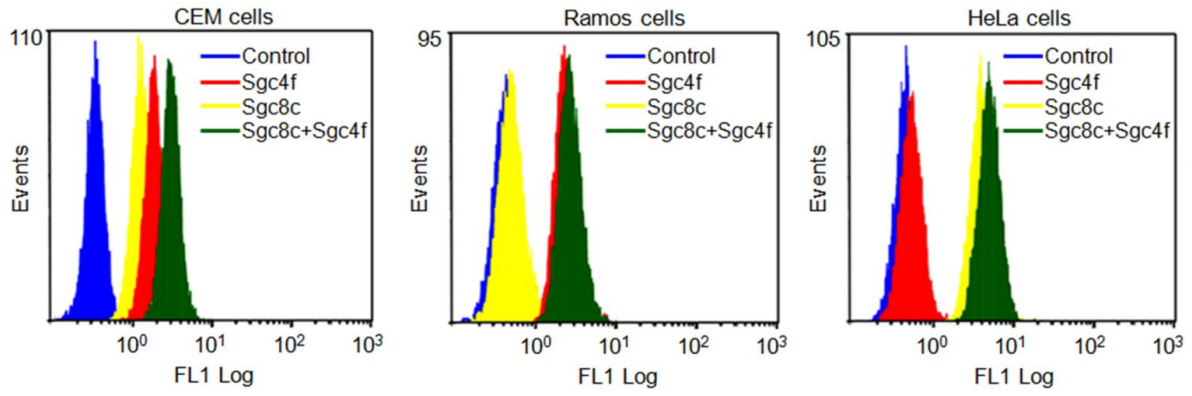

**Supplementary Figure 3 | Target recognition of aptamers sgc8c and sgc4f.** Flow cytometric assay of CEM, Ramos and HeLa cells incubated with fluorescein dye (FAM) labeled aptamers sgc8c, sgc4f, and mixture of sgc8c and sgc4f aptamers for 30 min.

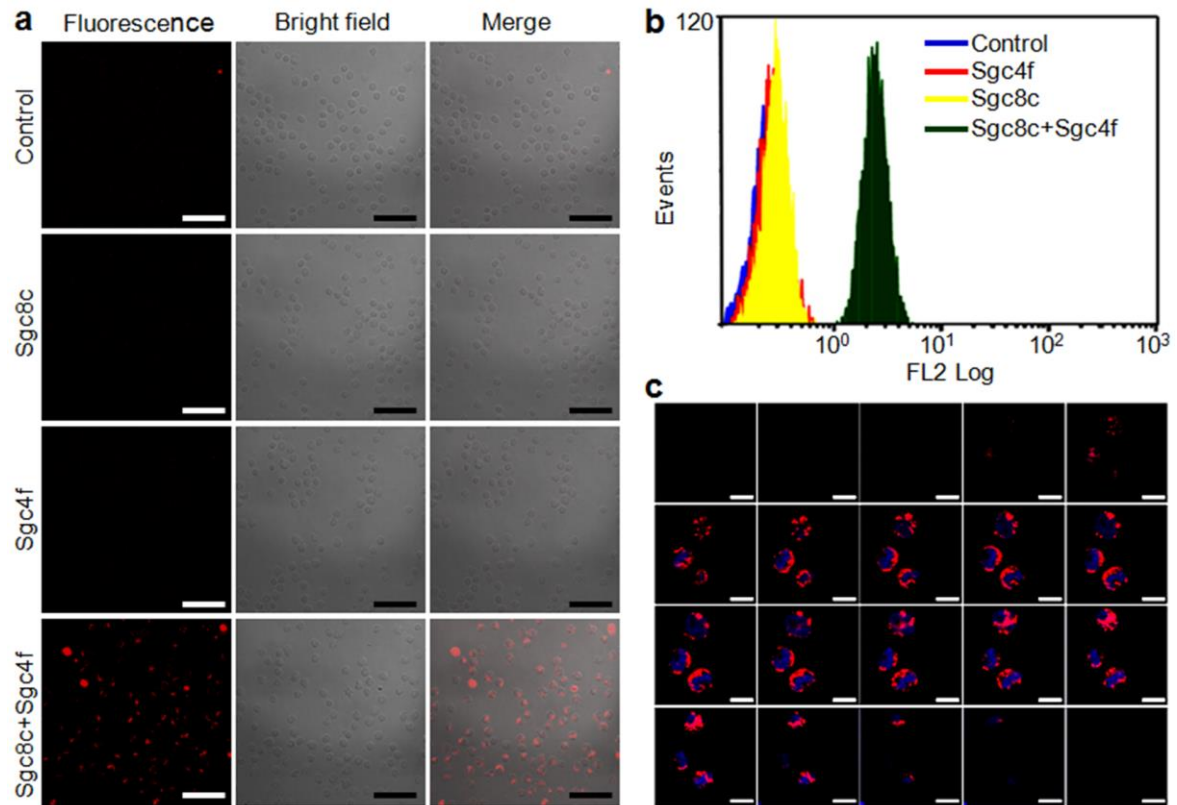

**Supplementary Figure 4 | Feasibility of “double locks” system controlled siRNA delivery.** (a) Confocal fluorescence microscopy images of CEM cells incubated with 100 nM Cy3-siRNA-ONV. CEM cells were pretreated with 50 nM of aptamers sgc8c, sgc4f, and the mixture of sgc8c and sgc4f aptamers. Scale bars: 50  $\mu$ m. (b) Flow cytometric assays of CEM cells incubated with Cy3-siRNA-ONV. CEM cells were pretreated with 50 nM of aptamers sgc8c, sgc4f, and mixture of sgc8c and sgc4f aptamers. (c) Z-stack images of CEM cells incubated with 100 nM Cy3-siRNA-ONV. Scale bars: 10  $\mu$ m.

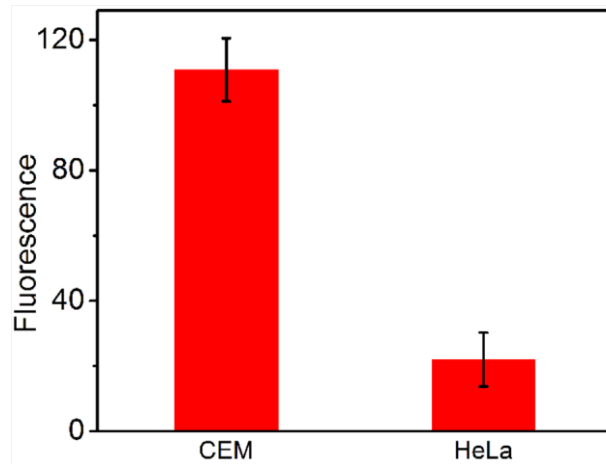

**Supplementary Figure 5 | Fluorescence intensity for quantitative analysis of siRNA-ONV internalized in HeLa and CEM cells.** Fluorescence intensity obtained from Figure 3 for the mixed HeLa and CEM cells after incubated with 100 nM Cy3-siRNA-ONV for 2 h. The data error bars indicate means  $\pm$  SD (n=20).

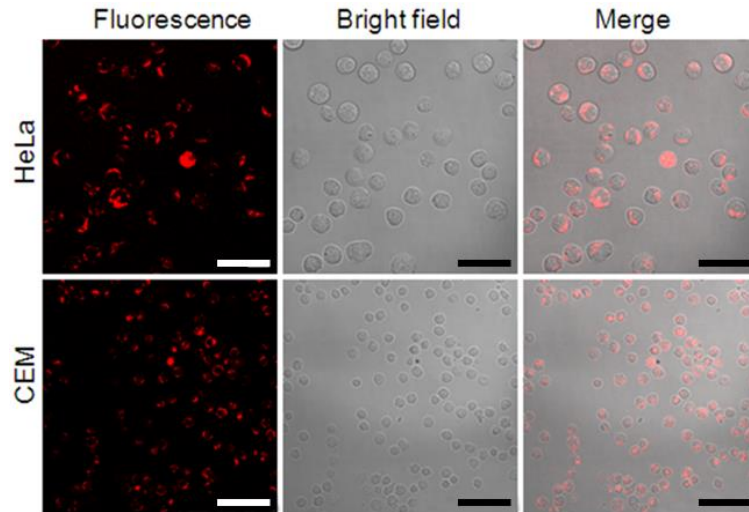

**Supplementary Figure 6 | Specificity of single-receptor targeted siRNA delivery.** Confocal fluorescence microscopic images of HeLa cells and CEM cells incubated with 100 nM negative control Cy3-siRNA-ONV (S-Cy3-siRNA-ONV). Both cells were pretreated with aptamers sgc4f and sgc8c. Scale bars: 50 μm.

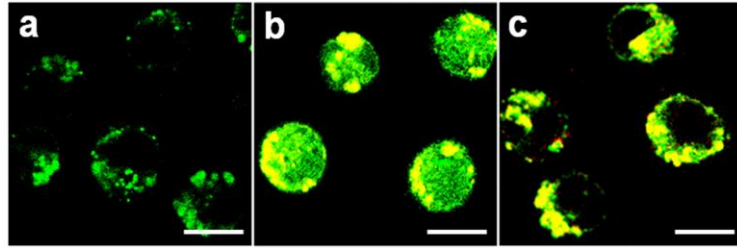

**Supplementary Figure 7 | Characterization of endosomal escape with cytoplasmic calcein release assay.** Confocal fluorescence microscopic images of CEM cells incubated with (a) 25  $\mu\text{M}$  calcein (green), (b) 25  $\mu\text{M}$  calcein and 100 nM Cy3-siRNA-ONV, and (c) 25  $\mu\text{M}$  calcein and 100 nM Cy3-siRNA-ONV-NR. Scale bars: 10  $\mu\text{m}$ .

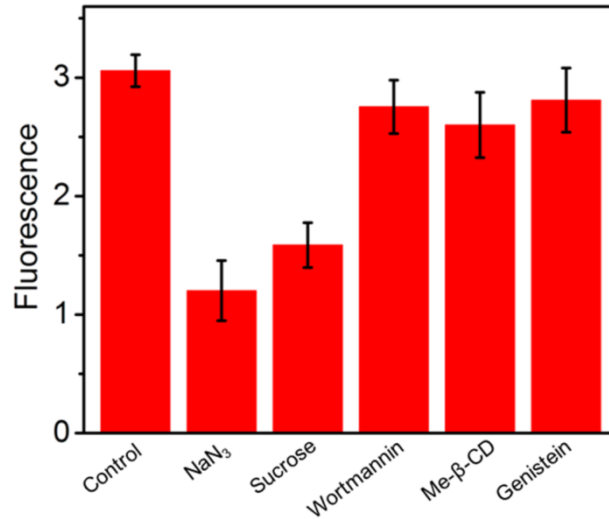

**Supplementary Figure 8 | Endocytosis pathways of siRNA-ONV in CEM cells.** Uptake inhibition of Cy3-siRNA-ONV in CEM cells preincubated with NaN<sub>3</sub> (10 mM), sucrose (450 mM), wortmannin (50 nM), methyl-β-cyclodextrin (Me-β-CD, 50 μM) and genistein (200 μg mL<sup>-1</sup>). Fluorescence from Cy3 was measured by flow cytometric assay. The data error bars indicate means ± SD (n=3).



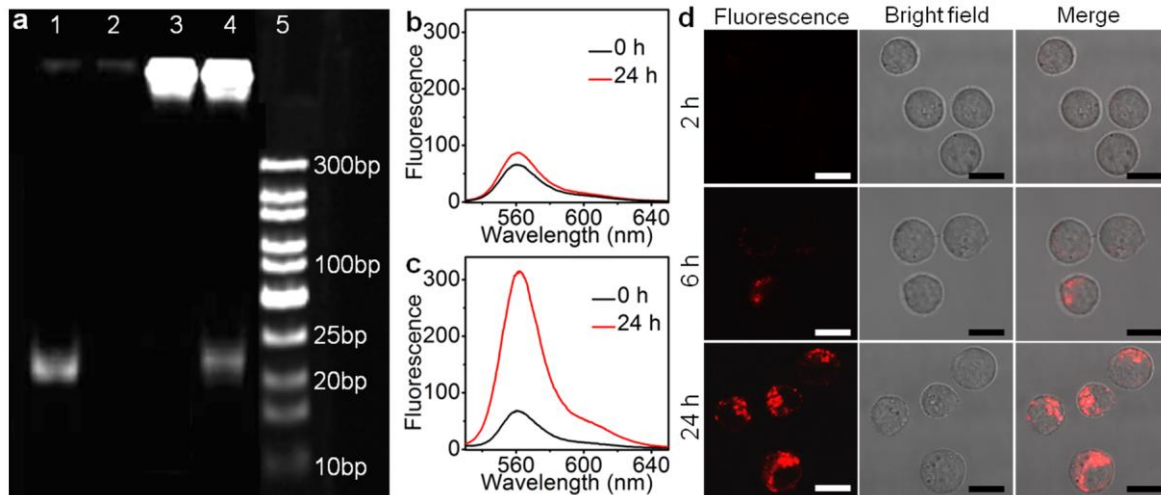

**Supplementary Figure 9 | Characterization of siRNA release.** (a) PAGE image of (1) 21 bp free siRNA, (2) cell lysate, (3) siRNA-ONV, (4) mixture of siRNA-ONV and cell lysate, (5) DNA ladder marker. Fluorescence spectra of SQ-siRNA-ONV nanotube in (b) 1xTAMg buffer and (c) cell lysate. The fluorescence recovery from Cy3-siRNA was generated by the disassembly of SQ-siRNA-ONV and measured with spectrofluorophotometer. (d) Confocal microscopic images of CEM cells loaded with SQ-siRNA-ONV, and incubated for 2, 6 and 24 h. The fluorescence recovery was observed via the disassembly of SQ-siRNA-ONV and release of Cy3-siRNA. Scale bars: 10 μm.

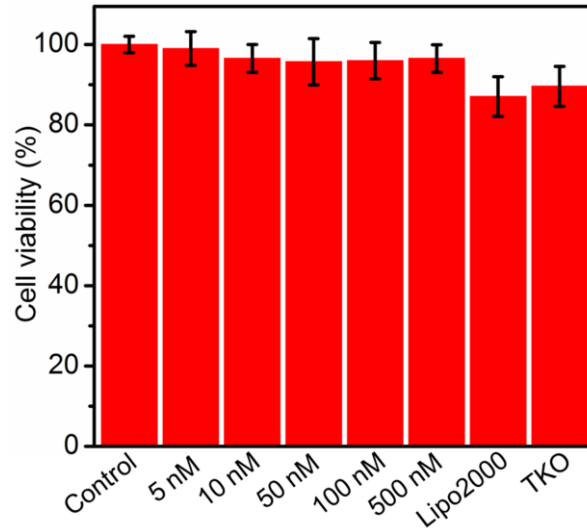

**Supplementary Figure 10 | Cytotoxicity assay.** Cytotoxicity induced by various concentrations of ONV, Lipo2000 (0.2  $\mu\text{L}$  per 100  $\mu\text{L}$  medium) and TKO (0.2  $\mu\text{L}$  per 100  $\mu\text{L}$  medium) in CEM cells. The data error bars indicate means  $\pm$  SD (n=3).

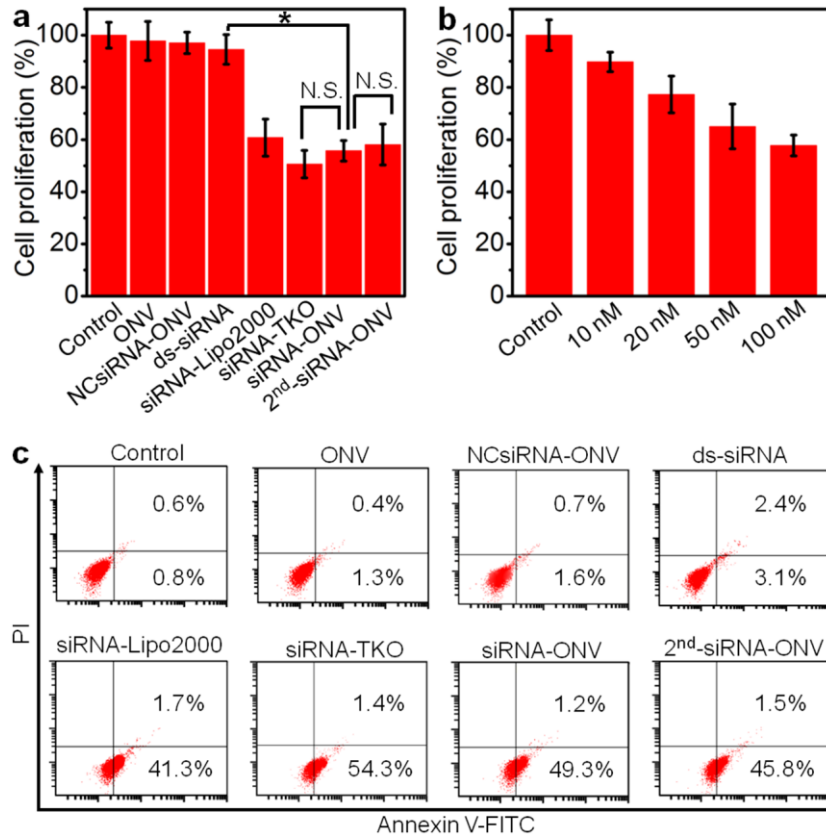

**Supplementary Figure 11 | Cell apoptosis assay.** Proliferation of CEM cells after incubated with (a) ONV (100 nM), NCsiRNA-ONV (100 nM), ds-siRNA (200 nM), siRNA-Lipo2000 (200 nM), siRNA-TKO (200 nM), siRNA-ONV (100 nM) and 2<sup>nd</sup>-siRNA-ONV (100 nM) respectively, and (b) various concentrations of siRNA-ONV. The cell proliferation was tested by the MTT assay, and the data indicate means  $\pm$  SD (n=3), \* $p$  < 0.05 (two-tailed Student's t-test). (c) Apoptosis of CEM cells after incubated with ONV, NCsiRNA-ONV, ds-siRNA, siRNA-Lipo2000, siRNA-TKO, siRNA-ONV, and 2<sup>nd</sup>-siRNA-ONV. The cell apoptosis was tested with Annexin V-FITC/PI apoptotic kit.

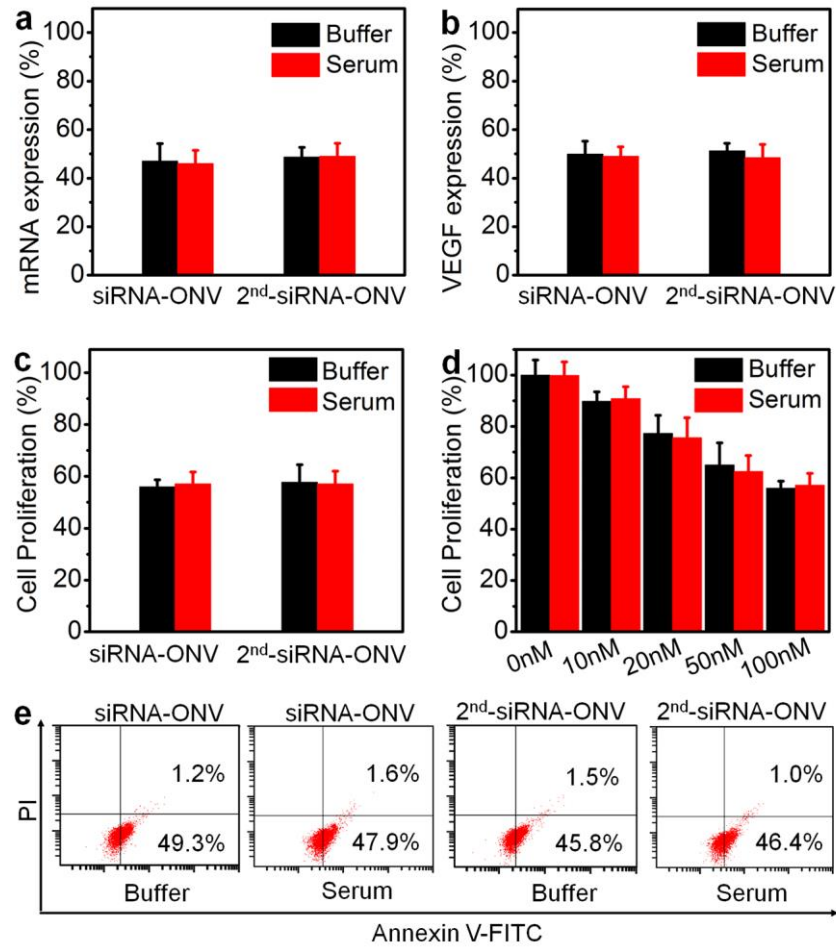

**Supplementary Figure 12 | Comparison of therapeutic efficacy under buffer and serum conditions.** (a) VEGF mRNA expression, (b) VEGF protein secretion levels, proliferation of CEM cells after incubated with (c) 100 nM siRNA-ONV and 100 nM 2<sup>nd</sup>-siRNA-ONV and (d) various concentrations of siRNA-ONV, and (e) apoptosis of CEM cells after incubated with 100 nM siRNA-ONV and 100 nM 2<sup>nd</sup>-siRNA-ONV. The data error bars indicate means  $\pm$  SD (n=3).

**Supplementary Table 1. Sequences of all oligonucleotides used in this work.**

| Oligonucleotides | Oligonucleotide sequences                                                                                                         |
|------------------|-----------------------------------------------------------------------------------------------------------------------------------|
| C1               | 5'-TGTTATCTCCGACGGTACTTCGTACAACGTGCCTCGAATGTAGA<br>GCGTGGCAGGCGGATGTGAAGCAGTTGCACCGGCATTGTC-3'                                    |
| C2               | 5'-GTCACTACTAATACACCTGTGCGATGAGGTTCCAAGTGTGGATAG<br>CTAGGTAAGACCGCATCTC-3'                                                        |
| R1               | 5'-AATGCCGGTGCAACTGCTACCAGGTGTATTAGTAGTGACGACT<br>TGCCTGGCCTTGGTCCATTTG-3'                                                        |
| BHQ2-R1          | 5'-AATGCCGGTGCAACTGCTACCAGGTGTATTAGTAGTGACGACT<br>TGCCTGGCCTTGGTCCATTTG-BHQ2-3'                                                   |
| R2               | 5'-ATGCGGTCTTACCTAGCTCCAGTACCGTCGGAGATAACAGAGT<br>TGCCTGGCCTTGGTCCATTTG-3'                                                        |
| BHQ2-R2          | 5'-ATGCGGTCTTACCTAGCTCCAGTACCGTCGGAGATAACAGAGT<br>TGCCTGGCCTTGGTCCATTTG-BHQ2-3'                                                   |
| V1               | 5'-TCCTAAAGCATGACCTTCCGAACATTCGAGGCACGTTGTACGT<br>CCACACTTGGAACCTCATCGCACATCCGCCTGCCACGCTCTTGTC<br>GGTGAGACGTTTACAGC-3'           |
| DNA primer       | 5'- <b>CCACCACAATGAAATTGCTATrAGGAAGAGAAGGAGGTGGTG</b><br><b>GAAAAAAAAAGCTGTAAACGTCTCACCG-3'</b>                                   |
| Control primer   | 5'-GAAGGAGGTGGTGGAAAAAAAAAGCTGTAAACGTCTCACCG-3'                                                                                   |
| DNA cycle        | 5' <sup>P</sup> -TCCTAAAGCATGACCTTCCGATGT <b>CGGTGAGACGTTTACAGC-3'</b>                                                            |
| Connect DNA      | 5'-TGCTTTAGGAGCTGTAAACG-3'                                                                                                        |
| Sgc4f            | 5'-ATCACTTATAACGAGTGCGGATGCAAACGCCAGACAGGGGGA<br>CAGGAGATAAGTGAAAAAAAAAATTCTCTT <b>CTCCGAGCCGGTCGA</b><br><b>AATAGCAAT-3'</b>     |
| FAM-sgc4f        | 5'-ATCACTTATAACGAGTGCGGATGCAAACGCCAGACAGGGGGA<br>CAGGAGATAAGTGAAAAAAAAAATTCTCTT <b>CTCCGAGCCGGTCGA</b><br><b>AATAGCAAT-FAM-3'</b> |
| Sgc8c            | 5'- <b>GGTGGTGGAAAGGACGTCCACCACCTCCTTCAAAAAAAAAATC</b><br><b>TAACTGCTGCGCCGCGGGAAAATACTGTACGGTTAGA-3'</b>                         |

|               |                                                                                                                  |
|---------------|------------------------------------------------------------------------------------------------------------------|
| FAM-sgc8c     | 5'-FAM- <b>GGTGGTGG</b> AAGGACGTCCACCACCTCCTTCAAAAAAAAA<br>AATCTAACTGCTGCGCCGCCGGGAAAATACTGTACGGTTAGA-3'         |
| BHQ2-sgc8c    | 5'-BHQ2- <b>GGTGGTGG</b> AAGGACGTCCACCACC(Cy3)TCCTTCAAA<br>AAAAAATCTAACTGCTGCGCCGCCGGGAAAATACTGTACGGTTAG<br>A-3' |
| VEGF forward  | 5'-AGGAGGGCAGAATCATCACG-3'                                                                                       |
| VEGF reverse  | 5'-CAAGGCCACAGGGATTTTCT-3'                                                                                       |
| GAPDH forward | 5'-AGGGCTGCTTTTAACTCTGGT-3'                                                                                      |
| GAPDH reverse | 5'-CCCCACTTGATTTTGGAGGGA-3'                                                                                      |

---

The binding regions between DNA primer and sgc4f (or FAM-sgc4f) as well as DNA cycle were shown in underlined and italics. The stem part of hairpin DNA in sgc8c (or FAM-sgc8c, BHQ2-sgc8c) and DNA primer both were shown in bold. The part of MNase catalytic core in sgc4f was shown in italics. The cleavage site for MNase in DNA primer was rA.
